# Supplementary material for: The Nereid on the rise: Platynereis as a model system
Source: EvoDevo. 2021 Sep 27;12:10. doi: 10.1186/s13227-021-00180-3 (PMC8477482; doi:10.1186/s13227-021-00180-3)
Supplement: Supplementary file 1 — Additional file 1: Table S1. List of techniques. [file 13227_2021_180_MOESM1_ESM.xlsx]

## Sheet: Sorted by topic
Method	Highlights, comments, limitations	Reference 1	Reference 2	Reference 3	Reference 4	Reference 5	Reference 6	Reference 7	Reference 8	...
Life cycle and Ecology
Platynereis aquaculture	Easy and cost-effective maintenance of cultures possible. Currently, different strains need to be maintained actively. This is time consuming and requires space. Cryopreservation for storing transgenic, mutant, and inbred lines needed. A stock center would be highly beneficial.	Kuehn et al. 2019	Fischer (ed.) 2013
Ecological and distribution data	unkown larval ecology	Veedin Rajan et al. 2021	Wäge et al. 2017	Popa et al. 2013	Giangrande et al. 2002
Toxicology		Jha et al. 1997	García-Alonso et al. 2011	André et al. 2017
Ageing	Animals exhibit hormonal changes over time that significantly impact on life expectancy and regeneration capacity. Detailed parallels and differences to other ageing models remain to be determined.	Golding and Yuwono 1994	Schenk et al, 2016	Schenk and Bannnister et al. 2019
Behavior
Chronobiology	Multiple behavioral assays exist for lab conditions, set-up for outside tracking and analyses is lacking, natural light conditions reletively well known, other ecological factors and their changes (temperature, CO2-levels, magnetic fields...) much less known	Zantke et al. 2013	Arboleda et al. 2019	Poehn and Krishnan et al. 2021	Zurl et al. 2021	Veedin Rajan et al. 2021
Predation assays		Bezares-Calderón et al. 2018
Larval and adult feeding assays	very important to exactly report the experimental conditions/strains used, as feeding depends on many environmental factors	Williams et al. 2015	Andreatta et al. 2020	Gambi et al. 2000	Kuehn et al. 2019
Microfluidic behavioral assays		Chartier et al. 2018	Ramanathan and Simakov et al. 2015
Behavioral tests, chemical cues in sensory ecology		Torres et al. 2021	Wäge et al. 2018	Chartier et al. 2018
Pharmacological Inhibitions (larval/embryonic development)	drugs readily reach the tissues in most life stages, potential concerns about specificity	Demilly et al. 2013	Gazave et al. 2017	Handberg-Thorsager and Gutierrez-Mazariegos et al. 2018	Handberg-Thorsager et al. 2019	Tomer et al. 2010	Lauri and Brunet et al. 2014	Denes and Jékely et al. 2007	Tosches et al. 2014	Schneider and Bowerman 2007	Žídek et al. 2018	Bakalenko et al. 2017
Pharmacological inhibitions (neuronal signalling)	drugs readily reach the tissues in most life stages, potential concerns about specificity	Conzelmann et al. 2011	Randel et al. 2014	Verasztó et al. 2017
Pharmacological inhibitions (regeneration)	drugs readily reach the tissues in most life stages, potential concerns about specificity	Planques et al. 2019	Planques et al. 2020
Pharmacological Inhibitions (rhythm and clock analyses)	drugs readily reach the tissues in most life stages, potential concerns about specificity	Zantke et al. 2013	Zurl et al. 2021	Poehn and Krishnan et al. 2021	Tosches et al. 2014
Cell ablation by genetic targeting	Robust technique when established for a specific enhancer driving nitroreductase, but requires careful calibration of the chemical (mtz) according to age, condition, expression level of the transgene. At present limited by the limited availability of enhancers.	Veedin Rajan et al. 2013	Ayers et al. 2018
Cell ablation by laser nanosurgery	can ablate single neurons, requires specialist equipment (pulsed UV laser or 2P laser), challenging to have appropriate "negative control"	Verasztó et al. 2017	Randel et al. 2014	Jékely et al. 2008
Electrophysiology	Technically challenging in the larvae due to the small size and cuticle	Conzelmann et al. 2011	Tosches et al. 2014
Imaging
Live-imaging	Embryos can be live-imaged for the entirety of embryogenesis (about 12-16 hours depending on temperature). Larvae are transparent, if mounted as embryos into low melting agarose they remain immobilized even after forming the ciliary bands, and can be live-imaged until 2 days post fertilization.Movement artifacts occur after 2 days because of muscle development. Possible to live image juvenile wor…	Lauri and Brunet et al. 2014	Vopalensky et al. 2019	Özpolat et al. 2017	Verasztó et al. 2017
Posterior regeneration stages, timeline and characterization (various approaches)		Planques et al. 2019	Kostyuchenko et al. 2018
Photoconversion during live imaging	Possible in early larvae, allows co-labelling following fixation and e.g. antibody staining	Verasztó et al. 2017	Lauri 2013
Live cell-cycle biosensor	More sensors needed for precisely labeling G0, G1, G2, S, and M phases.	Özpolat et al. 2017
Cell proliferation / cell death assays	Treatments at high EdU or BrdU concentrations can lead to delayed development. But the concentrations can be tested to find the effective and non-toxic ranges.	Gazave and Béhague et al. 2013	Demilly et al. 2013	Gazave et al. 2017	Planques et al. 2019
Calcium imaging	Works well in early larval stages, later stages are more difficult to immobilize, assignment of cell types to imageing data requires photoconversion or transgenic co-labelling	Tosches et al. 2014	Gühmann et al. 2015	Verasztó et al. 2017	Williams et al. 2017	Verasztó and Gühmann et al. 2018	Chartier et al. 2018	Bezares-Calderón et al. 2018
Clearing methods for imaging	Clearing has been shown to be compatible with detection of GFP, cell proliferation, mRNA and proteins, providing an entry point into deeper characterization of juvenile and adult specimens, and strongly pigmented tissues such as the adult eyes.	Pende et al. 2020	Asadulina et al. 2012
Histology		Pfeifer et al. 2014	Song et al. 2020	Tomer et al. 2010
Immunohistochemistry	Several custom antibodies available, most commercial antibodies may not cross-react	Conzelmann et al. 2011	Schneider and Bowerman 2007	Conzelmann and Jékely 2012	Poehn and Krishnan et al. 2021	Tomer et al. 2010	Tosches et al. 2014	Starunov et al 2017
Immunogold labeling for ultra-thin sections	EPON embedding only compatible with neuropeptide antibodies, works better on high-pressure-frozen samples	Shahidi et al. 2015
Hybridization Chain Reaction probe generation	Works nicely but high background levels in juvenile worms. Works well even for low level expressed genes. Can in principle be used for quantitative analyses.	https://github.com/rwnull/insitu_probe_generator	Kuehn et al 2021	Revilla-i-Domingo et al. 2021
In situ hybridization, single molecule FISH	smFISH works well for mid-/strongly expressed genes	Tessmar-Raible and Steinmetz et al. 2018	Bastin et al. 2015	Arendt et al 2002	Vergara et al., 2017
Chromosomal Fluorescent In Situ Hybridisation		Hui et al. 2012	Hui et al. 2007
Reflection-confocal microscopy of NBT/BCIP stained embryos	Needs special filters on the confocal, strongly expressed genes give a shading artifact	Jékely and Arendt 2018	Gazave et al. 2017
Embryonic and larval whole-body gene expression pattern registration		Gazave et al. 2017	Kostyuchenko et al. 2018	Asadulina et al. 2012	Asadulina et al. 2015	Vergara et al. 2017	Tomer et al. 2010		Vergara et al 2021 in press
scanning electron microscopy (SEM), serial block-face electron microscopy (SBEM)	fixation artifacts, requires expensive instrumentation and specialist techical skills	Williams et al. 2015	Vergara et al. 2020	Vergara et al 2021
TEM (ssTEM, Immuno EM)	fixation artifacts, requires expensive instrumentation and specialist techical skills	Shahidi et al. 2015	Randel et al. 2014	Randel and Shahidi et al. 2015	Randel et al. 2013
Connectomics	Larvae accessible for whole-body connectomics	Randel et al. 2014	Williams et al. 2017	Verasztó and Gühmann et al. 2018	Bezares-Calderón et al. 2018	Verasztó et al. 2020	Vergara et al 2021
Whole-body connectome and cell type complement	Can be queried with CATMAID or the natverse	Verasztó et al. 2020	https://catmaid.jekelylab.ex.ac.uk	Vergara et al 2021
Sequencing and DNA/ RNA editing	polymorphic cultures
PdumBase	custom BLAST page	http://140.109.48.81/platynereis/controller.php?action=blast
Jekely Lab transcriptomes	custom BLAST page	https://jekelylab.ex.ac.uk/blast/
Genome sequencing and assembly	High levels of heterogeneity in the genome. Genome assembly is in progress and not published but files shared among the community.
Global and gene-specific DNA methylation quantifications		Planques et al. 2020
Transcriptomics		Schenk and Bannnister et al. 2019	Conzelmann et al. 2013	Wäge et al. 2016
Stage-specific transcriptomes	staging may differ between labs due to differences in culture conditons (water, light, feed, etc.)	Chou et al. 2016	Chou et al. 2018
Single cell RNA sequencing/ single nuclei RNA sequencing		Achim et al. 2018	Achim and Pettit et al. 2015
Embryo microinjections	more than 200 eggs can be injected in one session, survival may be low when injecting DNA constructs. mRNA injections typically lead to protein expression within 1-3 hours depending on the concentration of mRNA injected, and the time of injection. Survival rate and efficiency depends strongly on the level of training of the injector.	Özpolat et al. 2017	Lauri and Brunet et al. 2014	Bannister et al. 2014	Backfisch et al. 2013	Conzelmann et al. 2013
CRISPR	polymorphism, long generation time, problems with genomic PCR due to polymorphic cultures. Knock-in efficiency need to be improved.	Bezares-Calderón et al. 2018
TALENS	highly effcient and by the nature of the longer recognition sites less likely to cause "off-target effects" than CRISPR/Cas9 injections. Requires longer time to make TALENs, but efficient protocol available. Important to pre-screen potential target sites for polymorphisms, and to have efficient read-out (via restriction enzyme/PCR) available.	Bannister et al. 2014	Veedin Rajan et al. 2021	Verasztó and Gühmann et al. 2018	Andreatta et al. 2020	Poehn and Krishnan et al. 2021	Zurl et al. 2021
Site-directed RNA editing	Requires chemical synthesis, not easily transferable	Hanswillemenke et al. 2015
Stable transgenesis	Robust transposon-mediated transgenesis has been developed (Tol2 and Mos1-mediated). Efficiencies differ (about 3% for Tol2, and 1% for Mos1). Tol2-integrated transgenes get silenced in F1, however Mos1-integrated transgenes persist expression. Site-directed transgensis to be established.	Backfisch et al. 2013	Backfisch and Kozin et al. 2014
Promoter/enhancer reporter constructs	Upstream promoter constructs (~1-10kb) only drive expression for approximately half of the genes. More cell-type-specific marker needed.	Verasztó et al. 2017	Backfisch et al. 2013	Backfisch and Kozin et al. 2014	Veedin Rajan et al. 2013
Gene knock-down (morpholinos, shRNA)	ideal to test antibody specificity, concerns about off-target effects, need several controls	Handberg-Thorsager and Gutierrez-Mazariegos et al. 2018	Conzelmann et al. 2013	Shahidi et al. 2015	Williams et al. 2015
Electroporation	Some promising results in embryos and juvenile worms, but needs optimization.
Biochemistry
Western Blotting	Limited by antibody availability, extraction from trunk tissue is very difficult due to the VERY high actvity of proteases from the gut.	Schneider and Bowerman 2007	Rebscher and Zelada-Gonzáles et al. 2007	Poehn and Krishnan et al. 2021	Zurl et al. 2021
Northern analysis		Pfeifer et al. 2014	Rebscher and Zelada-Gonzáles et al. 2007
GPCR deorphanisation	Large clades of GPCRs are still mostly orphan	Conzelmann et al. 2013	Bauknecht and Jékely 2015	Bauknecht and Jékely 2017	Williams et al. 2017	Andreatta et al. 2020
Peptide-gated ion channel	Only one identified so far, others remain orphan	Schmidt et al. 2018
Neuropeptidomics and peptidomics	some identified, but still many missing, will require further optimized extraction protocols for specific types of peptides/proteins	Conzelmann et al. 2013	Schenk and Bannnister et al. 2019	Veedin Rajan et al. 2021
photoreceptor (Opsin/Cryptochrome) spectra	high-resolution spectra require biochemical purification	Gühmann et al. 2015	Verasztó and Gühmann et al. 2018	Veedin Rajan et al. 2021	Ayers et al 2018	Tsukamoto et al. 2017	Revilla-i-Domingo et al. 2021	Zurl et al. 2021	Poehn and Krishnan et al. 2021
qRT-PCR	Well established reference genes for different conditions, stages. In general it is important to note that newly designed primers can be quite effected by the relatively frequent polymorphisms. Inbred strains are helpful, verification of primer efficiency for each new strain highly recommended.	Song et al. 2020	Arboleda et al. 2019	Pfeifer et al. 2014	Zantke et al. 2013	Andreatta et al. 2020	Poehn and Krishnan et al. 2021
Proteomics	Protocol for extraction of RNA and protein from the same sample established, but not optimized for specific protein classes of interest.	Schenk and Bannister et al 2019	Veedin Rajan et al. 2021
Educational resources
Embryogenesis and larval development		Reproduction and Postembryonic Development
		The Earliest Events in Spiralian Development
	Cell lineage tracking	Özpolat et al. 2017
	Schematics of larval development	Fischer et al, 2010
	Cell division	Fischer and Arendt 2013
Larval behavior	Phototaxis	Jékely et al. 2008
	Pharmacological experiments	Conzelmann et al. 2013
	Feeding	Williams et al. 2015
	Calcium imaging	Chartier et al. 2018
	Gut peristalsis	Brunet et al. 2016
	Phototaxis	Randel et al. 2014
	Calcium imaging	Verasztó et al. 2017
	Videos of startle behavior	Bezares-Calderón et al. 2018
Juvenile behavior	Gut peristalsis	Brunet et al. 2016
	Shadow reflex	Ayers et al. 2018
Mature worm behavior	Nuptial dance	Torres et al. 2021	Zurl et al. 2021
Chronobiology and photobiology	Lunar versus solar clocks	Zurl et al. 2021	Poehn and Krishnan et al. 2021	Andreatta and Tessmar-Raible 2020
	Seasonality in the marine environment	Veedin Rajan et al. 2021
Other educational videos		Annelid models - Focus on Platynereis
		Platynereis dumerilii - An Overview
		http://ssaft.com/Blog/dotclear/?post/2016/03/24/Observation-Microscopique-Platynereis-dumerilii
		https://www.youtube.com/watch?v=mJgMHBYFCP4
		https://twitter.com/hashtag/Platynereis?src=hashtag_click
